# Supplementary material for: Evaluation of the Xpert MTB Host Response assay for the triage of patients with presumed pulmonary tuberculosis: a prospective diagnostic accuracy study in Viet Nam, India, the Philippines, Uganda, and South Africa
Source: PubMed Central journal article supplement (PMC11046618; doi:10.1016/s2214-109x(23)00541-7), 2024-02
Supplement: NIHMS1982734-supplement-Supplementary_appendix_3.pdf [file NIHMS1982734-supplement-Supplementary_appendix_3.pdf]

### Supplementary appendix 3

This appendix formed part of the original submission and has been peer reviewed. We post it as supplied by the authors.

Supplement to: Gupta-Wright A, Ha H, Abdulgadar S, et al. Evaluation of the Xpert MTB Host Response assay for the triage of patients with presumed pulmonary tuberculosis: a prospective diagnostic accuracy study in Viet Nam, India, the Philippines, Uganda, and South Africa. *Lancet Glob Health* 2024; **12**: e226–34.

## **Appendix**

|                                                                                                                                                        |           |
|--------------------------------------------------------------------------------------------------------------------------------------------------------|-----------|
| <b>Details of additional contributors from the R2D2 TB Network.....</b>                                                                                | <b>2</b>  |
| <b>Supplementary methods.....</b>                                                                                                                      | <b>5</b>  |
| Table S1. R2D2 TB Network study enrolment sites and ethics committees .....                                                                            | 5         |
| Table S2. Procedure summary during participant enrolment and follow up.....                                                                            | 6         |
| Reasons for South Africa using capillary blood.....                                                                                                    | 8         |
| Details of reference standards.....                                                                                                                    | 8         |
| <b>Supplementary results .....</b>                                                                                                                     | <b>10</b> |
| Table S3: Demographical and clinical characteristics overall and by Microbiological Reference Standard (MRS) result .....                              | 11        |
| Figure S1. Histogram of Xpert HR TB Score and its components.....                                                                                      | 12        |
| Figure S2. Xpert TB HR Receiver Operating Characteristic (ROC) curve using previous calculation against microbiologic reference standard. ....         | 13        |
| Table S4: Univariable regression between TB Score and other variables .....                                                                            | 14        |
| Table S5: Area Under the Receiver Operating Characteristic (ROC) curve, overall and by subgroups.....                                                  | 14        |
| Table S6: Diagnostic accuracy of Xpert-HR by blood sampling method, stratified by HIV-status .....                                                     | 15        |
| Figure S3: Positive and negative predictive values for the Xpert-HR and WHO minimum Target Product Profile accuracy for a range of TB prevalence ..... | 16        |
| Figure S4: Numbers needing sputum testing based on a hypothetical cohort of 1000 patients with presumed TB and 10% TB prevalence .....                 | 17        |
| Table S9: Diagnostic Accuracy for the Xpert-HR based on Microbiological Reference Standard overall and by subgroup.....                                | 18        |
| Figure S5: Decision Curve Analysis stratified by HIV status .....                                                                                      | 19        |
| Table S8: Demographical and clinical characteristics overall and by country for secondary analysis using Sputum Xpert Reference Standard .....         | 20        |
| Table S9: Diagnostic Accuracy for the Xpert-HR based on Sputum Xpert Reference Standard overall and by subgroup.....                                   | 21        |
| Figure S5. Xpert TB HR Receiver Operating Characteristic (ROC) curve analysis against sputum Xpert reference standard. ....                            | 22        |
| <b>STARD checklist .....</b>                                                                                                                           | <b>23</b> |

### Details of additional contributors from the R2D2 TB Network

| First name                   | Surname      | Affiliation                                                                                      |
|------------------------------|--------------|--------------------------------------------------------------------------------------------------|
| <b>India</b>                 |              |                                                                                                  |
| Balamugesh                   | Thangakunam  | Christian Medical College, Vellore                                                               |
| Deepa                        | Shankar      | Christian Medical College, Vellore                                                               |
| Vinita                       | Ernest       | Christian Medical College, Vellore                                                               |
| Flavita                      | John         | Christian Medical College, Vellore                                                               |
| Bharath                      | Karthikeyan  | Christian Medical College, Vellore                                                               |
| Reena                        | Sekar        | Christian Medical College, Vellore                                                               |
| Divya                        | Mangal       | Christian Medical College, Vellore                                                               |
| Sai                          | Vijayasree   | Christian Medical College, Vellore                                                               |
| Swetha                       | Sankar       | Christian Medical College, Vellore                                                               |
| Mary                         | Shibiya      | Christian Medical College, Vellore                                                               |
| Priyadarshini                | Gajendran    | Christian Medical College, Vellore                                                               |
| Shanmugasu<br>ndaram         | Elango       | Christian Medical College, Vellore                                                               |
| Rajasekar                    | Sekar        | Christian Medical College, Vellore                                                               |
| <b>Philippines</b>           |              |                                                                                                  |
| Jared                        | Almonte      | De La Salle Medical and Health Sciences Institute                                                |
| Ramon                        | Basilio      | National TB Reference Laboratory, Research Institute for Tropical Medicine, Department of Health |
| Asella<br>Ruvijean           | Cariaga      | De La Salle Medical and Health Sciences Institute                                                |
| Raul                         | Destura      | National Institutes of Health, University of the Philippines Manila                              |
| Victoria                     | Dalay        | De La Salle Medical and Health Sciences Institute                                                |
| Karlo                        | Dayawon      | De La Salle Medical and Health Sciences Institute                                                |
| Darecil                      | Gelina       | De La Salle Medical and Health Sciences Institute                                                |
| Joseph<br>Aldwin             | Goleña       | De La Salle Medical and Health Sciences Institute                                                |
| Maria Marissa                | Golla        | De La Salle Medical and Health Sciences Institute                                                |
| Gidalthi<br>Jonathan         | Ilagan       | De La Salle Medical and Health Sciences Institute                                                |
| Dodge                        | Lim          | National TB Reference Laboratory, Research Institute for Tropical Medicine, Department of Health |
| Angelita                     | Pabruada     | De La Salle Medical and Health Sciences Institute                                                |
| Annalyn                      | Reyes        | De La Salle Medical and Health Sciences Institute                                                |
| Roeus<br>Vincent Arjay<br>G. | Reyes        | National TB Reference Laboratory, Research Institute for Tropical Medicine, Department of Health |
| Maricef                      | Tonquin      | De La Salle Medical and Health Sciences Institute                                                |
| <b>South Africa</b>          |              |                                                                                                  |
| Brigitta                     | Derendinger  | Stellenbosch University                                                                          |
| Megan                        | Hendrikse    | Stellenbosch University                                                                          |
| Anna                         | Okunola      | Stellenbosch University                                                                          |
| Zaida                        | Palmer       | Stellenbosch University                                                                          |
| <b>Uganda</b>                |              |                                                                                                  |
| Alfred                       | Andama       | Makerere University College of Health Sciences, Department of Medicine Kampala, Uganda           |
| Esther                       | Kisakye      | World Alliance for Lung and Intensive Care Medicine in Uganda (WALIMU)                           |
| Job                          | Mukwatamundu | World Alliance for Lung and Intensive Care Medicine in Uganda (WALIMU)                           |

| First name     | Surname   | Affiliation                                                                                                                                                              |
|----------------|-----------|--------------------------------------------------------------------------------------------------------------------------------------------------------------------------|
| Sandra         | Mwebe     | World Alliance for Lung and Intensive Care Medicine in Uganda (WALIMU)                                                                                                   |
| Martha         | Nakaye    | World Alliance for Lung and Intensive Care Medicine in Uganda (WALIMU)                                                                                                   |
| William        | Worodria  | Makerere University College of Health Sciences, Department of Medicine<br>Kampala, Uganda                                                                                |
| Justine        | Nyawere   | World Alliance for Lung and Intensive Care Medicine in Uganda (WALIMU)                                                                                                   |
| Alice          | Bukirwa   | World Alliance for Lung and Intensive Care Medicine in Uganda (WALIMU)                                                                                                   |
| Wilson         | Mangeni   | World Alliance for Lung and Intensive Care Medicine in Uganda (WALIMU)                                                                                                   |
| John Baptist   | Ssonko    | World Alliance for Lung and Intensive Care Medicine in Uganda (WALIMU)                                                                                                   |
| Annet          | Nakaweesa | World Alliance for Lung and Intensive Care Medicine in Uganda (WALIMU)                                                                                                   |
| Irene          | Nassuna   | World Alliance for Lung and Intensive Care Medicine in Uganda (WALIMU)                                                                                                   |
| Irene          | Nekesa    | World Alliance for Lung and Intensive Care Medicine in Uganda (WALIMU)                                                                                                   |
| David          | Katumba   | World Alliance for Lung and Intensive Care Medicine in Uganda (WALIMU)                                                                                                   |
| Lucy           | Asege     | World Alliance for Lung and Intensive Care Medicine in Uganda (WALIMU)                                                                                                   |
| Talemwa        | Nalugwa   | World Alliance for Lung and Intensive Care Medicine in Uganda (WALIMU)                                                                                                   |
| <b>Vietnam</b> |           |                                                                                                                                                                          |
| Hai            | Dang      | Vietnam National Tuberculosis Program-University of California San Francisco Research Collaboration Unit, Hanoi, Vietnam                                                 |
| Luong          | Dinh      | Vietnam National Lung Hospital                                                                                                                                           |
| Thien          | Doan      | Hanoi Lung Hospital, Hanoi, Vietnam                                                                                                                                      |
| Hang           | Do        | Hanoi Lung Hospital, Hanoi, Vietnam                                                                                                                                      |
| Tam            | Do        | Hanoi Lung Hospital, Hanoi, Vietnam                                                                                                                                      |
| Hien           | Le        | Vietnam National Tuberculosis Program-University of California San Francisco Research Collaboration Unit, Center for Promotion of Advancement of Society, Hanoi, Vietnam |
| Nguyet         | Le        | National TB reference Lab/ Vietnam National Lung Hospital, Hanoi, Vietnam                                                                                                |
| Anh            | Nguyen    | Hanoi Lung Hospital, Hanoi, Vietnam                                                                                                                                      |
| Dong           | Nguyen    | Hanoi Lung Hospital, Hanoi, Vietnam                                                                                                                                      |
| Hanh           | Nguyen    | Vietnam National Tuberculosis Program-University of California San Francisco Research Collaboration Unit, Center for Promotion of Advancement of Society, Hanoi, Vietnam |
| Hoang          | Nguyen    | Hanoi Lung Hospital, Hanoi, Vietnam                                                                                                                                      |
| Thanh          | Nguyen    | Hanoi Lung Hospital, Hanoi, Vietnam                                                                                                                                      |
| Nam            | Pham      | Vietnam National Tuberculosis Program-University of California San Francisco Research Collaboration Unit, Hanoi Lung Hospital, Hanoi, Vietnam                            |
| Thuong         | Pham      | Hanoi Lung Hospital, Hanoi, Vietnam                                                                                                                                      |

| First name     | Surname        | Affiliation                                                                                                                                                              |
|----------------|----------------|--------------------------------------------------------------------------------------------------------------------------------------------------------------------------|
| Ha             | Phan           | Vietnam National Tuberculosis Program-University of California San Francisco Research Collaboration Unit, Center for Promotion of Advancement of Society, Hanoi, Vietnam |
| Trang          | Trinh          | Vietnam National Tuberculosis Program-University of California San Francisco Research Collaboration Unit, Center for Promotion of Advancement of Society, Hanoi, Vietnam |
| <b>USA</b>     |                |                                                                                                                                                                          |
| Robert         | Castro         | University of California San Francisco                                                                                                                                   |
| Catherine      | Cook           | University of California San Francisco                                                                                                                                   |
| Tessa          | Mochizuki      | University of California San Francisco                                                                                                                                   |
| Midori         | Kato-Maeda     | University of California San Francisco                                                                                                                                   |
| Ruvandhi       | Nathavitharana | Beth Israel Deaconess Medical Center<br>Harvard Medical School                                                                                                           |
| Kevin          | Nolan          | University of California San Francisco                                                                                                                                   |
| Kinari         | Shah           | University of California San Francisco                                                                                                                                   |
| Swati          | Sudarsan       | University of California San Francisco                                                                                                                                   |
| Christina      | Yoon           | University of California San Francisco                                                                                                                                   |
| <b>Germany</b> |                |                                                                                                                                                                          |
| Ioana-Diana    | Olaru          | Heidelberg University Hospital, Heidelberg, Germany                                                                                                                      |
| Maria del Mar  | Castro Noriega | Heidelberg University Hospital, Heidelberg, Germany                                                                                                                      |
| Seda           | Yerlikaya      | Heidelberg University Hospital, Heidelberg, Germany                                                                                                                      |

## Supplementary methods

**Table S1. R2D2 TB Network study enrolment sites and ethics committees**

| <b>City, Country</b>         | <b>Enrollment sites</b>                                                                                                                            | <b>Ethics Committee*</b>                                                                                                                                                                                                                                         |
|------------------------------|----------------------------------------------------------------------------------------------------------------------------------------------------|------------------------------------------------------------------------------------------------------------------------------------------------------------------------------------------------------------------------------------------------------------------|
| Vellore, India               | CMC Pulmonary Outpatient Department, Primary care clinics in Vellore (Shalom/LCC, Chittoor, CHAD) and Chittoor (CMC satellite campus)              | Christian Medical College Institutional Review Board (13256)                                                                                                                                                                                                     |
| Hanoi, Vietnam               | Outpatient departments, Hanoi Lung Hospital                                                                                                        | Ministry of Health Ethical Committee for National Biological Medical Research (94/CN-HĐĐĐ); National Lung Hospital Ethical Committee for Biological Medical Research (566/2020/NCKH); Hanoi Lung Hospital Science and Technology Initiative Committee (22/BVPHN) |
| Dasmariñas City, Philippines | Community-based screening in Dasmariñas City and nearby municipalities, outpatient clinics in Dasmariñas City                                      | De La Salle Health Sciences Institute Independent Ethics Committee (2020-33-02-A)                                                                                                                                                                                |
| Cape Town, South Africa      | Scottsdene and Wallacedene primary care clinics; Brooklyn Chest Hospital; Khayelitsha District Health Center; Kraaifontein Community Health Clinic | Stellenbosch University Health Research Ethics Committee (M20/07/020)                                                                                                                                                                                            |
| Kampala, Uganda              | Mulago Outpatient Department, Kisenyi Health Center,                                                                                               | Makerere University, College of Health Sciences, School of Medicine, Research Ethics Committee (2020-182)                                                                                                                                                        |

\* The study was additionally approved by the University of California San Francisco Institutional Review Board (20-32670), and the University of Heidelberg Ethics Committee of the Medical Faculty (S-539/2020).

**Table S2.** Procedure summary during participant enrolment and follow up

LEGEND. X: applies to all participants; Y: applies to people without a known TB diagnosis

| Procedure                          | Enrolment |       | Follow-up Visit 1 <sup>1</sup> | Notes                                                                                                                                              |
|------------------------------------|-----------|-------|--------------------------------|----------------------------------------------------------------------------------------------------------------------------------------------------|
|                                    | Day 1     | Day 2 |                                |                                                                                                                                                    |
| Demographic/Clinical questionnaire | X         |       | Y                              |                                                                                                                                                    |
| TB symptom assessment              | X         |       | Y                              |                                                                                                                                                    |
| Chest X-ray                        | Y         |       | Y                              | •All CXRs undergo digitization                                                                                                                     |
| Finger prick blood collection      | X         |       |                                | •All participants: HIV, Hemoglobin A1c (in some sites this is done using blood collected from venipuncture in a central lab)<br>•novel blood tests |
| Venipuncture <sup>4</sup>          | Y         |       |                                | •HbA1c if done in a central lab<br>•CD4 cell count (if HIV-positive)<br>•novel blood tests                                                         |

|                                                  |   |   |   |                                                                                                                                                                                                                                                                                                                                                                                                                                                               |
|--------------------------------------------------|---|---|---|---------------------------------------------------------------------------------------------------------------------------------------------------------------------------------------------------------------------------------------------------------------------------------------------------------------------------------------------------------------------------------------------------------------------------------------------------------------|
| <b>Spot sputum<sup>4</sup> collection</b>        | X |   | Y | <ul style="list-style-type: none"> <li>•Participants without known TB diagnosis: Xpert Ultra x 1, Smear microscopy and MGIT culture x 2, storage. Sputum collection will be repeated on Day 2 if initial Xpert Ultra results are indeterminate or trace-positive.</li> <li>•Participants with RIF-resistance by Xpert: MGIT culture, DNA extraction, novel rDST assays, storage</li> <li>•Sputum induced if participants are unable to expectorate</li> </ul> |
| <b>Urine collection<sup>4</sup></b>              | Y |   |   | <ul style="list-style-type: none"> <li>•Urine Xpert Ultra conducted on HIV-positive participants only then discontinued part-way through the study due to low yield.</li> </ul>                                                                                                                                                                                                                                                                               |
| <b>Other TB testing per clinician discretion</b> | X | X | X | <ul style="list-style-type: none"> <li>•Results of any additional mycobacterial culture or Xpert testing from other samples (e.g. pleural fluid, tissue biopsy, etc.) requested by clinicians recorded</li> </ul>                                                                                                                                                                                                                                             |

<sup>1</sup> Follow-up visit 1 conducted at 3-months if the participant has a negative/indeterminate sputum Xpert Ultra result at baseline AND no positive culture

<sup>2</sup>For all participants without confirmed TB but a positive novel TB triage or diagnostic test result, trained study staff collect 1 follow-up spot sputum specimen for Xpert Ultra (x1) and mycobacterial culture (1 liquid, 1 solid) and perform a CXR.

<sup>3</sup>All left-over samples stored.



## Reasons for South Africa using capillary blood

Cepheid instructs that blood may be collected for Xpert TB Host Response using either capillary sampling or venipuncture (phlebotomy) sampling. If capillary sampling is used, blood must not be held in the minivette for more than 15 minutes due to risk of clogging. If using venipuncture, an EDTA blood collection tube can be stored at 2-8 °C up to 24 h before testing. Due to onsite logistical constraints, South Africa was the only site able to conduct the test immediately following blood collection, allowing for capillary sampling.

## Details of reference standards

### Primary: Microbiologic reference standard (MRS)

The primary reference standard for all novel tests will be a microbiologic reference standard defined by Xpert Ultra for sputum, Xpert Ultra for urine, and sputum MGIT culture. The MRS is based only on baseline test results and does not incorporate any results from follow-up visits.

- TB positive will include participants with:
  - A positive result on sputum Xpert Ultra (grade very low, low, medium, high) **OR**
  - A positive culture in MGIT **OR**
  - A positive culture in solid culture media (e.g. 7H10 or LJ agar\*) **OR**
  - Two trace Xpert Ultra results on sputum
- TB negative will include participants with:
  - No positive result (sputum Xpert Ultra, culture) **AND EITHER**
    - 2 negative cultures in MGIT **OR**
    - 2 negative cultures in solid media (e.g. 7H10 or LJ agar\*) **OR**
    - 1 negative culture in MGIT and 1 negative in solid media (e.g. 7H10 or LJ agar\*)†
- Indeterminate will include participants with:
  - No positive result (sputum Xpert Ultra, urine Xpert Ultra, culture), **AND**
  - <2 trace Ultra results on sputum and/or urine **AND**
  - <2 negative cultures due to contamination or pending results.

\* Cultures on solid media will not routinely be done but may be done when MGIT is not available.

† The initial protocol in India included only one sputum culture from August 16 to November 18 2021. Therefore, participants enrolled in India during this period are considered to be TB negative by MRS if they do not have a positive sputum Xpert result AND their single sputum culture result is negative.

### Secondary: Sputum Xpert Ultra Reference Standard (SXRS)

Additionally, we will consider a simplified reference standard using the same definitions as the MRS but using sputum Xpert Ultra results only to classify participants as TB positive or Not TB positive.

The objective of inclusion of this reference standard is to assess sensitivity of a novel triage test in the context of a programmatic setting where only sputum Xpert Ultra is available as a confirmatory diagnostic test (*i.e.*, culture is not done as part of routine care). Sensitivity is therefore the focus of this reference standard, nevertheless specificity will be calculated for secondary analyses.

- TB positive will include participants with:
  - A positive baseline sputum Xpert Ultra result (grade very low, low, medium, high), **OR**

- Two trace baseline sputum Xpert Ultra results
- TB negative will include participants with:
  - A negative baseline sputum Xpert Ultra result, **WITHOUT** any trace or positive baseline sputum Xpert Ultra results.
- TB indeterminate will include participants where neither criteria for TB positive nor TB negative are met.

## **Supplementary results**

### **Indeterminate reference standard results**

Of the 115 indeterminate reference standard results: 15 had two contaminated cultures; 87 had one contaminated culture and one negative culture result; 2 had one contaminated culture and one culture positive for non-tuberculous mycobacteria; 8 had one negative and one missing culture result. Of these 115, 68 had follow-up sputum culture results of which none were positive for TB.

**Table S3:** Demographical and clinical characteristics overall and by Microbiological Reference Standard (MRS) result

| <b>N</b>                                    |                                                  | <b>Overall</b>    | <b>MRS TB Negative</b> | <b>MRS TB Positive</b> | <b>p-value</b> |
|---------------------------------------------|--------------------------------------------------|-------------------|------------------------|------------------------|----------------|
|                                             |                                                  | 1499              | 1170                   | 329                    |                |
| <b>Country</b>                              | <b>Philippines</b>                               | 325 (21.7%)       | 296 (25.3%)            | 29 (8.8%)              | <0.001         |
|                                             | <b>Vietnam</b>                                   | 284 (18.9%)       | 176 (15.0%)            | 108 (32.8%)            |                |
|                                             | <b>South Africa</b>                              | 300 (20.0%)       | 243 (20.8%)            | 57 (17.3%)             |                |
|                                             | <b>Uganda</b>                                    | 314 (20.9%)       | 205 (17.5%)            | 109 (33.1%)            |                |
|                                             | <b>India</b>                                     | 276 (18.4%)       | 250 (21.4%)            | 26 (7.9%)              |                |
| <b>Sex</b>                                  | <b>Male</b>                                      | 813 (54.2%)       | 590 (50.4%)            | 223 (67.8%)            | <0.001         |
|                                             | <b>Female</b>                                    | 686 (45.8%)       | 580 (49.6%)            | 106 (32.2%)            |                |
| <b>Age, mean (SD), years</b>                |                                                  | 42.3 (15.5)       | 43.2 (15.4)            | 39.1 (15.5)            | <0.001         |
| <b>BMI, median (IQR)</b>                    |                                                  | 21.4 (19.1, 25.2) | 22.5 (19.8, 26.4)      | 19.4 (17.8, 21.0)      | <0.001         |
| <b>Cough for 2 weeks</b>                    |                                                  | 1499 (100.0%)     | 1170 (100.0%)          | 329 (100.0%)           |                |
| <b>Fever</b>                                |                                                  | 533 (35.6%)       | 344 (29.4%)            | 189 (57.4%)            | <0.001         |
| <b>Weight loss</b>                          |                                                  | 702 (46.8%)       | 475 (40.6%)            | 227 (69.0%)            | <0.001         |
| <b>Night Sweats</b>                         |                                                  | 528 (35.2%)       | 358 (30.6%)            | 170 (51.7%)            | <0.001         |
| <b>Prior TB diagnosis<sup>a</sup></b>       | <b>Yes</b>                                       | 290 (19.3%)       | 231 (19.7%)            | 59 (17.9%)             | 0.46           |
| <b>Person living with HIV<sup>b</sup></b>   | <b>Yes</b>                                       | 229 (15.3%)       | 184 (15.8%)            | 45 (13.7%)             | 0.37           |
|                                             | <b>Median CD4, cells/<math>\mu</math>L (IQR)</b> | 399 (206, 667)    | 445.5 (240.0, 675.5)   | 258.5 (115.0, 529.0)   | <0.001         |
| <b>Diabetes</b>                             | <b>Yes</b>                                       | 202 (13.5%)       | 142 (12.1%)            | 60 (18.2%)             | 0.004          |
| <b>Sputum Xpert status<sup>c</sup></b>      | <b>Negative</b>                                  | 1201 (80.1%)      | 1169 (99.9%)           | 32 (9.7%)              | <0.001         |
|                                             | <b>Positive</b>                                  | 297 (19.8%)       | 0 (0.0%)               | 297 (90.3%)            |                |
| <b>Venous or capillary blood collection</b> | <b>Capillary</b>                                 | 1170 (78.1%)      | 231 (19.7%)            | 55 (16.7%)             | 0.22           |
|                                             | <b>Venous</b>                                    | 329 (21.9%)       | 939 (80.3%)            | 274 (83.3%)            |                |

<sup>a</sup>3 participants were unsure about prior TB diagnoses. <sup>b</sup>3 participants had an unknown HIV status. <sup>c</sup>1 participant was missing a sputum Xpert result. MRS microbiological reference standard. SD Standard Deviation; IQR Interquartile Range

**Figure S1.** Histogram of Xpert HR TB Score and its components

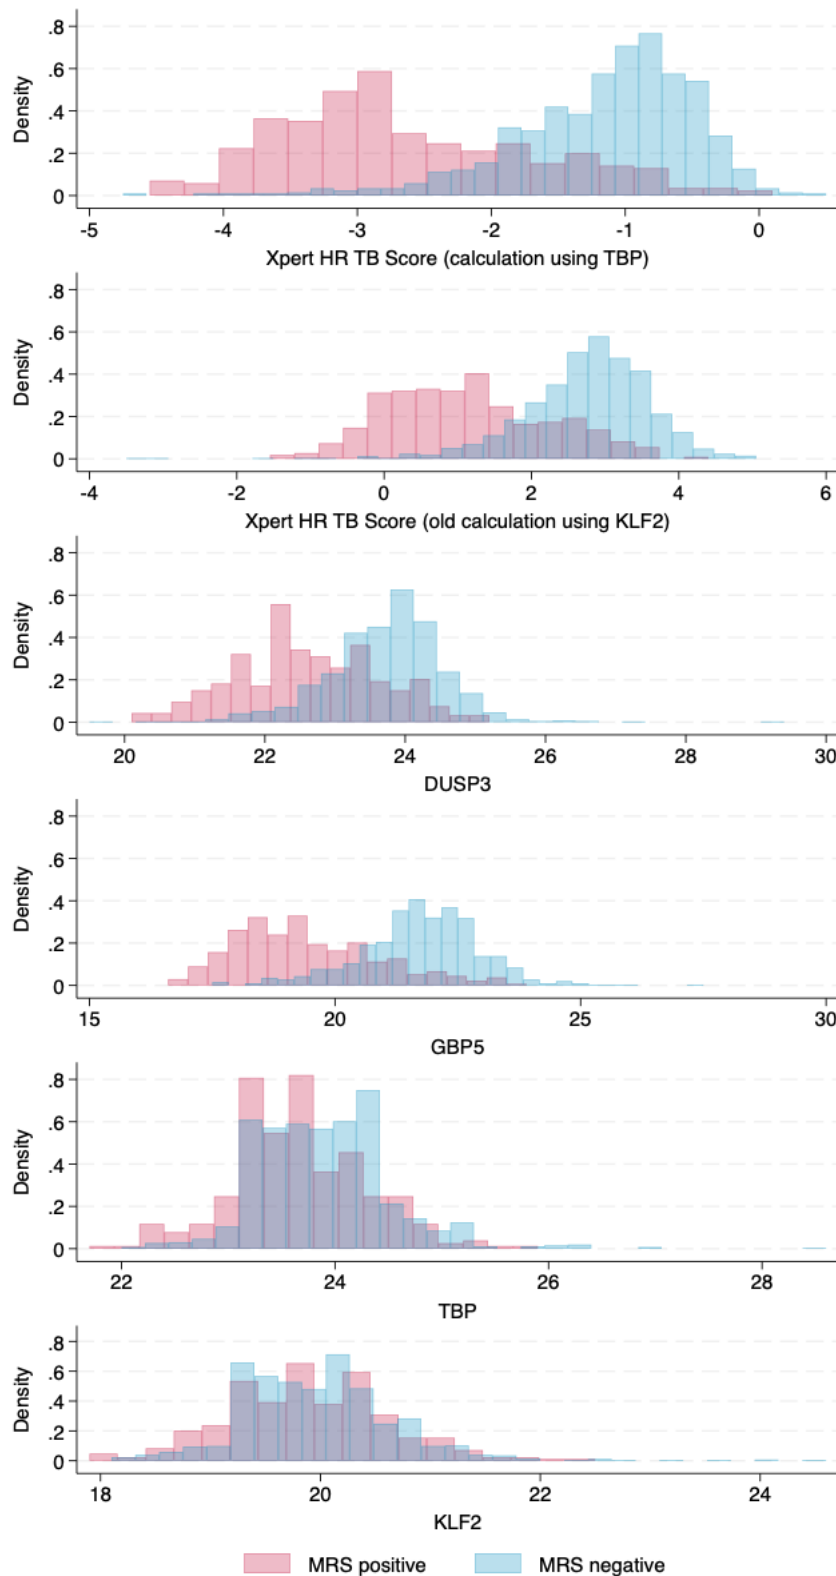

*Xpert HR TB Score (panel 1) is calculated as  $(Ct\ GBP5 + Ct\ DUSP3)/2 - Ct\ TBP$ . A previous version of the assay used an alternate calculation using KLF2 in place of TBP (panel 2). Ct Cycle threshold; GBP5 guanylate binding protein 5; DUSP3 dual specificity phosphatase 3; KLF2 Krüppel-like factor 2; TBP TATA-binding protein; MRS microbiological reference standard. Median TB Score was -2.85 (IQR -3.28 to -2.18) for participants positive by MRS, and -1 (IQR -1.5 to -0.7) for participants negative by MRS.*

**Figure S2.** Xpert TB HR Receiver Operating Characteristic (ROC) curve using previous calculation against microbiologic reference standard.

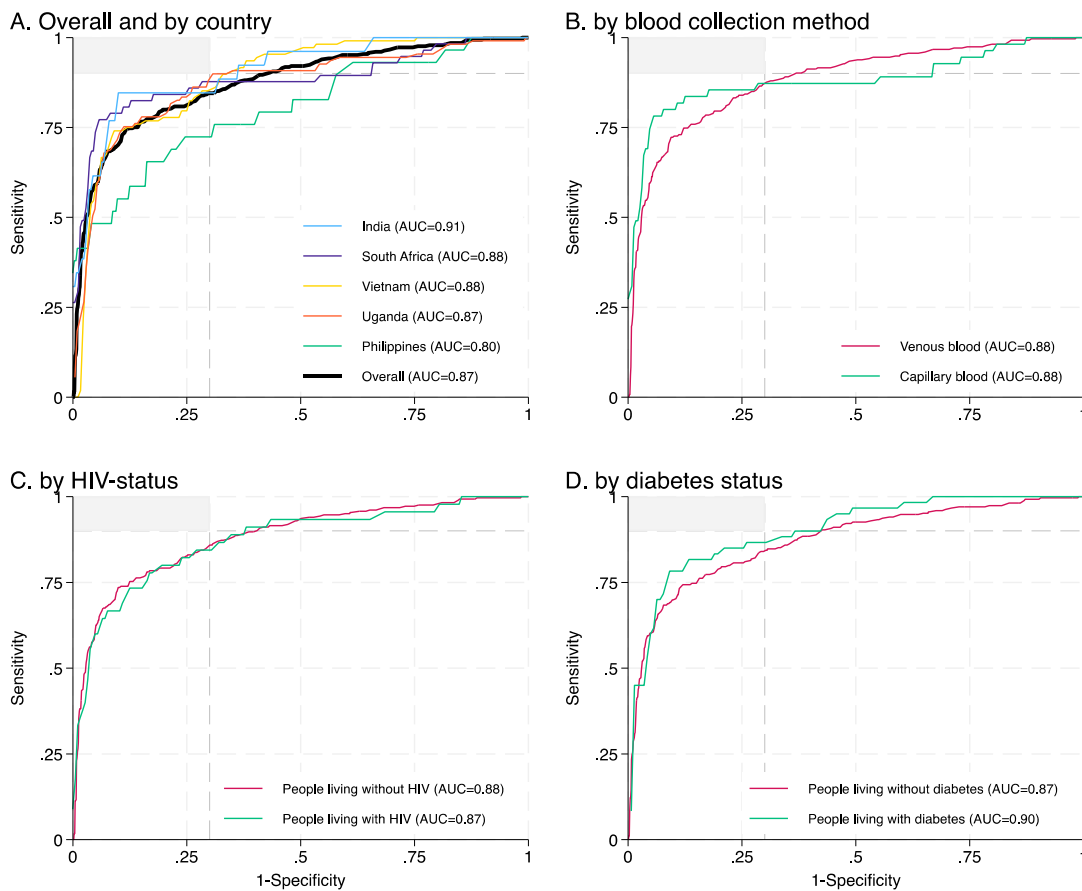

Previous studies calculated the TB score using KLF2 instead of TBP. Here we present the ROC curves using this calculation:  $\text{Ct GBP5} + \text{Ct DUSP3} / 2 - \text{Ct KLF2}$ . The median TB Score calculated in this manner was 1.00 (IQR 0.30 to 1.9) for participants positive by MRS, and 2.85 (IQR 2.30 to -3.30) for participants negative by MRS. Using this calculation, the optimal cut-point defining a positive test in this population would be  $\leq 2.7$ . Using this cut-point, sensitivity against the MRS is 90.3% (297/329, 95%CI 86.5-93.3), and specificity against the MRS is 56.8% (664/1170, 95% CI 53.9-59.6).

**Table S4:** Univariable regression between TB Score and other variables

|                                                         |                     | <b>Coefficient</b> | <b>95% CI</b> | <b>R<sup>2</sup></b> | <b>p-value</b> |
|---------------------------------------------------------|---------------------|--------------------|---------------|----------------------|----------------|
| <b>Country</b>                                          | <b>Philippines</b>  | 0.71               | 0.56 - 0.86   | 0.072                | <0.001         |
|                                                         | <b>Vietnam</b>      | 0.48               | 0.33 - 0.63   |                      |                |
|                                                         | <b>South Africa</b> | 0.63               | 0.48 - 0.77   |                      |                |
|                                                         | <b>Uganda</b>       | 0.63               | 0.48 - 0.77   |                      |                |
|                                                         | <b>India</b>        | 0.25               | 0.10 - 0.40   |                      |                |
| <b>Sex</b>                                              | <b>Male</b>         | 0.13               | 0.03 - 0.23   | 0.005                | 0.009          |
| <b>Age, years</b>                                       |                     | -0.16              | -0.31 - 0.28  | 0.026                | 0.839          |
| <b>BMI</b>                                              |                     | -0.05              | -0.06 - -0.04 | 0.077                | <0.001         |
| <b>Person living with HIV<sup>a</sup></b>               | <b>Yes</b>          | 0.30               | 0.16 - 0.43   | 0.012                | <0.001         |
| <b>Diabetes</b>                                         | <b>Yes</b>          | 0.13               | -0.11 - 0.28  | 0.002                | 0.07           |
| <b>Sputum Xpert semi-quantitative grade<sup>b</sup></b> | <b>Trace</b>        | -0.12              | -0.73 - 0.49  | 0.097                | <0.001         |
|                                                         | <b>Low</b>          | 0.41               | 0.11 - 0.72   |                      |                |
|                                                         | <b>Medium</b>       | 0.78               | 0.47 - 1.10   |                      |                |
|                                                         | <b>High</b>         | 0.66               | 0.34 - 0.97   |                      |                |
| <b>C-reactive protein</b>                               |                     | 0.01               | 0.01 - 0.01   | 0.24                 | <0.001         |

Linear regression to assess associations with TB Score, transformed to a positive value. N=1,499. Continuous variables assumed to be linear and based on a one unit increase. Categorical variables fitted as factors. <sup>a</sup>3 participants missing their HIV status. <sup>b</sup>303 participants with positive Xpert results included in this analysis

**Table S5:** Area Under the Receiver Operating Characteristic (ROC) curve, overall and by subgroups

|                               |              | <b>Number of observations</b> | <b>Area under the ROC curve</b> | <b>(95%CI)</b> | <b>χ<sup>2</sup> test p-value</b> |
|-------------------------------|--------------|-------------------------------|---------------------------------|----------------|-----------------------------------|
| <b>Overall</b>                |              | 1499                          | 0.89                            | (0.86-0.91)    |                                   |
| <b>Country</b>                | Philippines  | 325                           | 0.83                            | (0.75-0.91)    | 0.244*                            |
|                               | Vietnam      | 284                           | 0.88                            | (0.84-0.92)    | 0.938*                            |
|                               | South Africa | 300                           | 0.90                            | (0.84-0.95)    | 0.694*                            |
|                               | Uganda       | 314                           | 0.87                            | (0.82-0.92)    | 0.463*                            |
|                               | India        | 276                           | 0.91                            | (0.85-0.97)    | 0.448*                            |
| <b>Sex</b>                    | Male         | 813                           | 0.87                            | (0.83-0.91)    | 0.375                             |
|                               | Female       | 686                           | 0.89                            | (0.87-0.92)    |                                   |
| <b>Person living with HIV</b> | No           | 1267                          | 0.88                            | (0.81-0.94)    | 0.774                             |
|                               | Yes          | 229                           | 0.89                            | (0.87-0.91)    |                                   |
| <b>Diabetes</b>               | No           | 1297                          | 0.89                            | (0.84-0.95)    | 0.790                             |
|                               | Yes          | 202                           | 0.88                            | (0.86-0.91)    |                                   |

Area under the ROC (AUROC) were compared using DeLong's test. \*For country, the p-value is comparing the ROC for that country to the AUROC for the other countries.

**Table S6:** Diagnostic accuracy of Xpert-HR by blood sampling method, stratified by HIV-status

| Blood sampling method for Xpert-HR | Living with HIV |                      |                      | Not living with HIV |                      |                      |
|------------------------------------|-----------------|----------------------|----------------------|---------------------|----------------------|----------------------|
|                                    | N (row %)       | Sensitivity (95% CI) | Specificity (95% CI) | N (row %)           | Sensitivity (95% CI) | Specificity (95% CI) |
| <b>Venous</b>                      | 114 (9.4%)      | 95.8% (78.9 - 99.9%) | 45.6% (35.0-56.4%)   | 1,099 (90.6%)       | 89.6% (85.1-93.1%)   | 66.1% (62.8-69.3%)   |
| <b>Capillary</b>                   | 115 (40.6)      | 95.2% (76.2 - 99.9%) | 44.7% (34.4-55.3%)   | 168 (59.4%)         | 87.9% (71.8 - 96.6%) | 64.4% (55.8-72.5%)   |

Capillary blood sampling occurred at only at the South Africa site. Using Chi-squared tests, the p-values for specificity comparing venous and capillary sampling is 0.891 for people living with HIV and 0.665 for people not living with HIV

**Table S7:** Cross tabulation of TB culture results and highest Xpert Ultra semi-quantitative grade for participants positive by the microbiological reference standard

|                       | TB culture not done | TB culture positive | TB culture negative |
|-----------------------|---------------------|---------------------|---------------------|
| <b>Trace</b>          | 3*                  | 2                   | 0                   |
| <b>Very low</b>       | 44                  | 0                   | 0                   |
| <b>Low</b>            | 95                  | 0                   | 0                   |
| <b>Medium</b>         | 76                  | 0                   | 0                   |
| <b>High</b>           | 79                  | 0                   | 0                   |
| <b>Xpert negative</b> | 0                   | 30                  | 1,170               |

\*3 patients had 2 Xpert Ultra trace results

**Table S8:** Cross tabulation of TB culture results and highest Xpert Ultra semi-quantitative grade for participants positive by the microbiological reference standard

|                       | TB culture not done | TB culture positive |
|-----------------------|---------------------|---------------------|
| <b>Trace</b>          | 3*                  | 2                   |
| <b>Very low</b>       | 44                  | 0                   |
| <b>Low</b>            | 95                  | 0                   |
| <b>Medium</b>         | 76                  | 0                   |
| <b>High</b>           | 79                  | 0                   |
| <b>Xpert negative</b> | 0                   | 30                  |

\*3 patients had 2 Xpert Ultra trace results



**Figure S3:** Positive and negative predictive values for the Xpert-HR and WHO minimum Target Product Profile accuracy for a range of TB prevalence

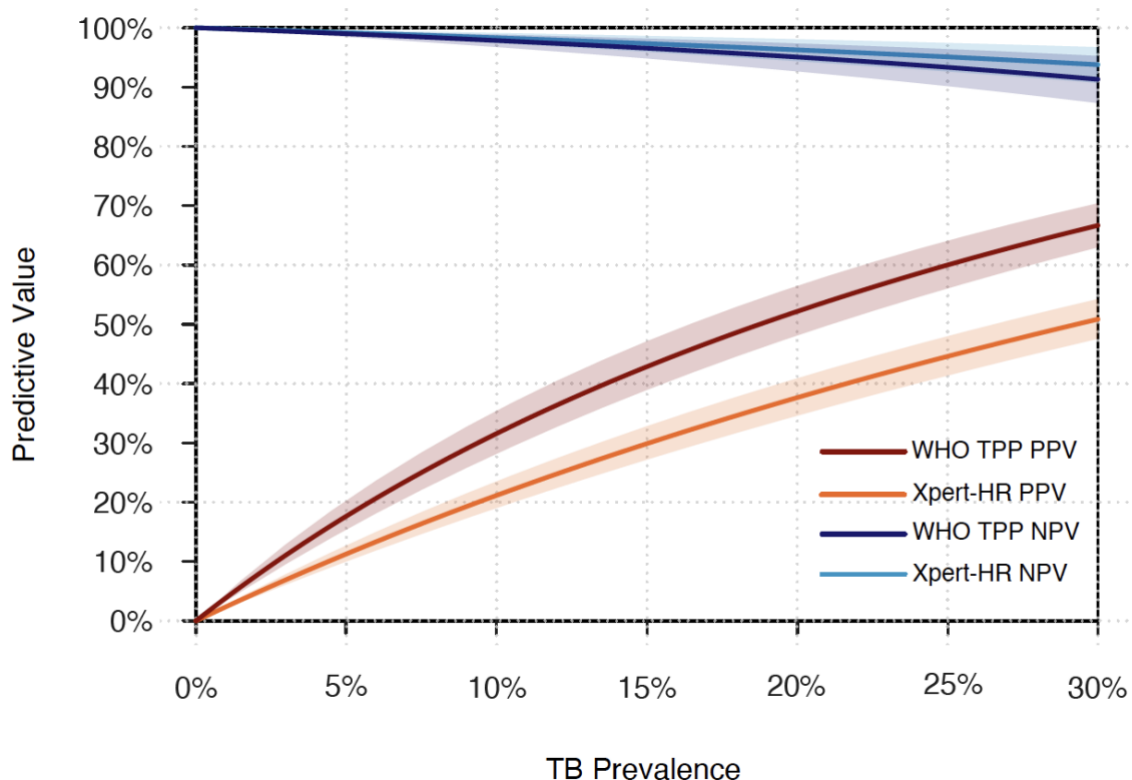

Positive and negative predictive values plotted for different TB prevalence, based on a cut-point of  $\leq -1.25$  (i.e. sensitivity of 90.3% and specificity of 62.6%). The WHO TPP lines are based on a hypothetical triage test minimum criteria (sensitivity of 90% and specificity of 70%). Shaded areas represent 95% confidence intervals. Analysis done using 'plot-curve' in R. Xpert HR PPVs are 11.3%, 21.2%, 29.9% and 37.6%, and NPVs 99.2%, 98.3%, 97.3% and 96.3% for TB prevalence of 5%, 10%, 15% and 20% respectively. PPV positive predictive value; NPV negative predictive value; WHO World Health Organization; TPP Target Product Profile.

**Figure S4:** Numbers needing sputum testing based on a hypothetical cohort of 1000 patients with presumed TB and 10% TB prevalence

A

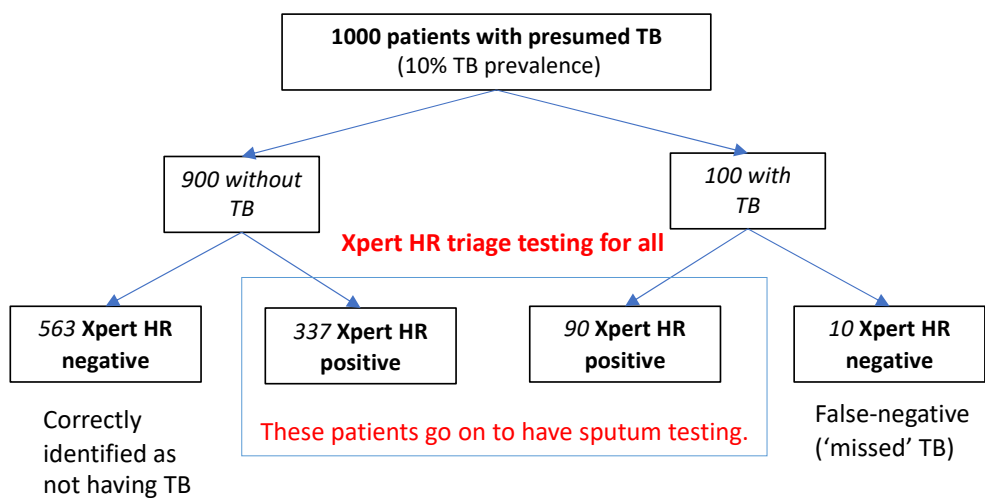

B

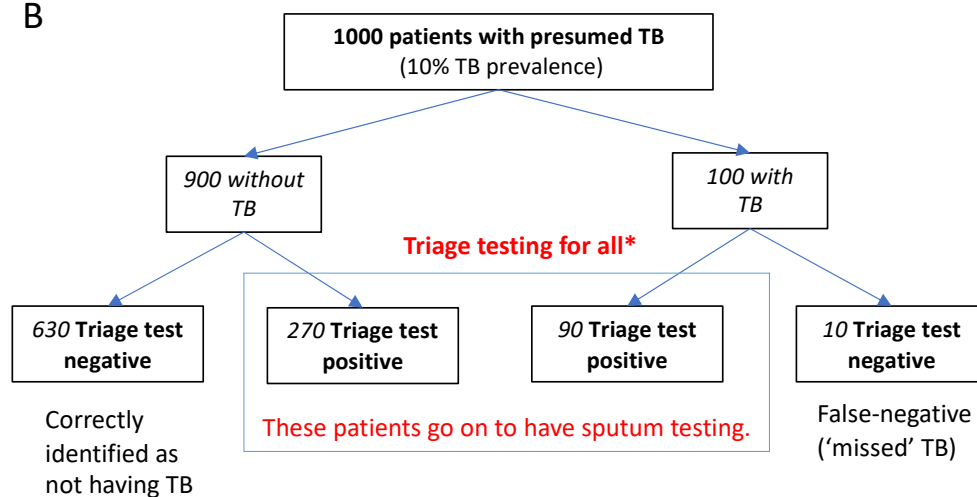

Panel A presents a hypothetical cohort tested with the Xpert-HR triage test. Panel B is based on a hypothetical triage test that meets WHO minimum TPP targets. Assumes all patients have valid test results.

**Table S9:** Diagnostic Accuracy for the Xpert-HR based on Microbiological Reference Standard overall and by subgroup

| Category                                          |                     | TP  | FP  | FN | TN  | TB prevalence (%) | Sensitivity (%) | (95%CI)     | Specificity (%) | (95%CI)     | PPV (%) | (95%CI)     | NPV (%) | (95%CI)     |
|---------------------------------------------------|---------------------|-----|-----|----|-----|-------------------|-----------------|-------------|-----------------|-------------|---------|-------------|---------|-------------|
| <b>Overall (cut-point <math>\leq</math>-1.25)</b> |                     | 297 | 438 | 32 | 732 | 21.9              | 90.3            | (86.5-93.3) | 62.6            | (59.7-65.3) | 40.4    | (36.8-44.1) | 95.8    | (94.1-97.1) |
| <b>Country</b>                                    |                     |     |     |    |     |                   |                 |             |                 |             |         |             |         |             |
|                                                   | <b>Philippines</b>  | 22  | 78  | 7  | 218 | 8.9               | 75.9            | (56.5-89.7) | 73.6            | (68.2-78.6) | 22.0    | (14.3-31.4) | 96.9    | (93.6-98.7) |
|                                                   | <b>Vietnam</b>      | 102 | 82  | 6  | 94  | 38.0              | 94.4            | (88.3-97.9) | 53.4            | (45.8-60.9) | 55.4    | (47.9-62.7) | 94.0    | (87.4-97.8) |
|                                                   | <b>South Africa</b> | 52  | 105 | 5  | 138 | 19.0              | 91.2            | (80.7-97.1) | 56.8            | (50.3-63.1) | 33.1    | (25.8-41.1) | 96.5    | (91.7-98.8) |
|                                                   | <b>Uganda</b>       | 97  | 75  | 12 | 130 | 34.7              | 89.0            | (81.6-94.2) | 63.4            | (56.4-70.0) | 56.4    | (48.6-63.9) | 91.5    | (84.2-94.8) |
|                                                   | <b>India</b>        | 24  | 98  | 2  | 152 | 9.4               | 92.3            | (74.9-99.1) | 60.8            | (54.4-66.9) | 19.7    | (13.0-27.8) | 98.7    | (95.2-99.8) |
| <b>Sex</b>                                        |                     |     |     |    |     |                   |                 |             |                 |             |         |             |         |             |
|                                                   | <b>Female</b>       | 203 | 210 | 20 | 380 | 15.5              | 88.7            | (81.1-94.0) | 60.7            | (56.6-64.7) | 29.2    | (24.3-34.5) | 96.7    | (93.8-98.0) |
|                                                   | <b>Male</b>         | 94  | 228 | 12 | 352 | 27.4              | 91.0            | (86.5-94.4) | 64.4            | (60.4-68.3) | 49.2    | (44.2-54.1) | 95.0    | (92.2-96.8) |
| <b>HIV status</b>                                 |                     |     |     |    |     |                   |                 |             |                 |             |         |             |         |             |
|                                                   | <b>HIV +ve</b>      | 43  | 101 | 2  | 83  | 19.7              | 95.6            | (84.9-99.5) | 45.1            | (37.8-52.6) | 29.9    | (22.5-38.0) | 97.6    | (91.4-99.7) |
|                                                   | <b>HIV -ve</b>      | 253 | 336 | 30 | 648 | 22.3              | 89.4            | (85.2-92.7) | 65.9            | (62.8-68.8) | 43.0    | (38.9-47.1) | 95.6    | (93.4-96.8) |
| <b>Diabetes</b>                                   |                     |     |     |    |     |                   |                 |             |                 |             |         |             |         |             |
|                                                   | <b>Yes</b>          | 53  | 44  | 7  | 98  | 29.7              | 88.3            | (77.4-95.2) | 69.0            | (60.7-76.5) | 54.6    | (44.2-64.8) | 93.3    | (86.4-97.2) |
|                                                   | <b>No</b>           | 244 | 394 | 25 | 634 | 20.7              | 90.7            | (86.6-93.9) | 61.7            | (58.6-64.7) | 38.2    | (34.5-42.1) | 96.2    | (94.1-97.3) |
| <b>Collection method</b>                          |                     |     |     |    |     |                   |                 |             |                 |             |         |             |         |             |
|                                                   | <b>capillary</b>    | 50  | 101 | 5  | 130 | 19.2              | 90.9            | (80.0-97.0) | 56.3            | (49.6-62.8) | 33.1    | (25.7-41.2) | 96.3    | (91.3-98.7) |
|                                                   | <b>venous</b>       | 247 | 337 | 27 | 602 | 22.6              | 90.1            | (86.0-93.4) | 64.1            | (60.9-67.2) | 42.3    | (38.2-46.4) | 95.7    | (93.5-96.9) |

TP True positive, FP False positive, FN False Negative, TN true negative, PPV positive predictive value, NPV negative predictive value

**Figure S5:** Decision Curve Analysis stratified by HIV status

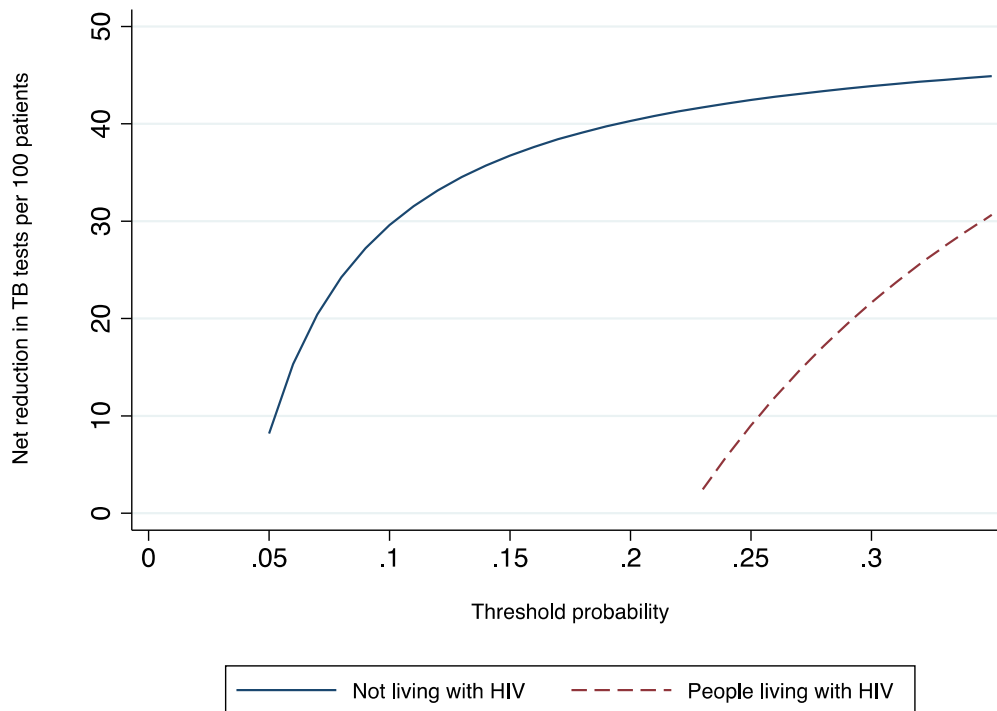

*Decision curve analysis*, shown as net reduction in (sputum-based) TB tests per 100 patients tested with Xpert-HR weighted by a range of threshold probabilities from 5 to 30%, stratified by HIV status. The threshold probability describes how clinicians and patients value different outcomes, and can be defined as the minimum probability of TB disease at which further testing would be warranted. A low threshold probability could reflect a clinician and/or patient who are very concerned about missing TB disease and therefore likely to do further TB testing. For example, a 5% threshold probability (equivalent to a risk:benefit odds of 1:19) where missing TB disease is 19 times worse than unnecessary testing, would lead to a net reduction of approximately 9 TB tests per 100 patients in people not living with HIV, but no net benefit in PLHIV. In contrast, clinicians and/or patients may be less worried about TB and not want to do further sputum-based testing, leading to a higher threshold probability. For example a 25% threshold probability, (equivalent to a risk:benefit odds of 1:3) the risk of missing TB is 3 times worse than unnecessary investigations for TB, and would lead to a net reduction in approximately 42 TB tests per 100 patients in people not living with HIV, but only 10 TB tests per 100 patients in PLHIV.

**Table S8:** Demographical and clinical characteristics overall and by country for secondary analysis using Sputum Xpert Reference Standard

|                                             |                                                  | <b>Overall</b>       | <b>Philippines</b>   | <b>Vietnam</b>       | <b>South Africa</b>  | <b>Uganda</b>        | <b>India</b>         |
|---------------------------------------------|--------------------------------------------------|----------------------|----------------------|----------------------|----------------------|----------------------|----------------------|
| <b>N</b>                                    |                                                  | 1606                 | 352                  | 303                  | 340                  | 328                  | 283                  |
| <b>Sex</b>                                  | <b>Male</b>                                      | 874 (54.4%)          | 156 (44.3%)          | 187 (61.7%)          | 173 (50.9%)          | 189 (57.6%)          | 169 (59.7%)          |
|                                             | <b>Female</b>                                    | 732 (45.6%)          | 196 (55.7%)          | 116 (38.3%)          | 167 (49.1%)          | 139 (42.4%)          | 114 (40.3%)          |
| <b>Age, mean (SD), years</b>                |                                                  | 42.5 (15.5)          | 40.1 (15.4)          | 51.6 (15.9)          | 40.0 (12.2)          | 34.9 (12.7)          | 47.5 (15.5)          |
| <b>BMI, median (IQR)</b>                    |                                                  | 21.5 (19.1, 25.2)    | 23.6 (20.2, 27.5)    | 20.2 (18.7, 21.9)    | 22.3 (19.4, 28.3)    | 20.8 (19.0, 24.0)    | 22.4 (19.0, 26.0)    |
| <b>Cough for 2 weeks</b>                    |                                                  | 1606 (100.0%)        | 352 (100.0%)         | 303 (100.0%)         | 340 (100.0%)         | 328 (100.0%)         | 283 (100.0%)         |
| <b>Fever</b>                                |                                                  | 568 (35.4%)          | 51 (14.5%)           | 106 (35.0%)          | 123 (36.2%)          | 222 (67.7%)          | 66 (23.3%)           |
| <b>Weight loss</b>                          |                                                  | 754 (46.9%)          | 99 (28.1%)           | 88 (29.0%)           | 218 (64.1%)          | 226 (68.9%)          | 123 (43.5%)          |
| <b>Night Sweats</b>                         |                                                  | 566 (35.2%)          | 57 (16.2%)           | 94 (31.0%)           | 188 (55.3%)          | 201 (61.3%)          | 26 (9.2%)            |
| <b>Prior TB diagnosis<sup>b</sup></b>       | <b>Yes</b>                                       | 316 (19.7%)          | 46 (13.1%)           | 63 (20.8%)           | 127 (37.4%)          | 41 (12.5%)           | 39 (13.8%)           |
| <b>Person living with HIV<sup>a</sup></b>   | <b>Yes</b>                                       | 254 (15.8%)          | 3 (0.9%)             | 2 (0.7%)             | 138 (40.8%)          | 101 (30.8%)          | 10 (3.5%)            |
|                                             | <b>Median CD4, cells/<math>\mu</math>L (IQR)</b> | 396.0 (204.0, 654.0) | 527.0 (184.0, 812.0) | 547.0 (497.0, 597.0) | 402.5 (205.0, 667.0) | 355.0 (200.0, 613.0) | 587.0 (220.0, 692.0) |
| <b>Diabetes</b>                             | <b>Yes</b>                                       | 213 (13.3%)          | 46 (13.1%)           | 71 (23.4%)           | 19 (5.6%)            | 26 (7.9%)            | 51 (18.0%)           |
| <b>Sputum Xpert status<sup>c</sup></b>      | <b>Negative</b>                                  | 1309 (81.5%)         | 330 (93.8%)          | 207 (68.3%)          | 291 (85.6%)          | 222 (67.7%)          | 259 (91.5%)          |
|                                             | <b>Positive</b>                                  | 297 (18.5%)          | 22 (6.2%)            | 96 (31.7%)           | 49 (14.4%)           | 106 (32.3%)          | 24 (8.5%)            |
| <b>TB Microbiologic reference standard</b>  | <b>TB Negative</b>                               | 1165 (72.8%)         | 296 (84.1%)          | 176 (58.1%)          | 241 (70.9%)          | 203 (61.9%)          | 249 (89.6%)          |
|                                             | <b>TB Positive</b>                               | 327 (20.4%)          | 29 (8.2%)            | 108 (35.6%)          | 56 (16.5%)           | 109 (33.2%)          | 25 (9.0%)            |
|                                             | <b>Indeterminate</b>                             | 109 (6.8%)           | 27 (7.7%)            | 19 (6.3%)            | 43 (12.6%)           | 16 (4.9%)            | 4 (1.4%)             |
| <b>Venous or capillary blood collection</b> | <b>Capillary</b>                                 | 325 (20.2%)          | 0 (0.0%)             | 0 (0.0%)             | 325 (95.6%)          | 0 (0.0%)             | 0 (0.0%)             |
|                                             | <b>Venous</b>                                    | 1281 (79.8%)         | 352 (100.0%)         | 303 (100.0%)         | 15 (4.4%)            | 328 (100.0%)         | 283 (100.0%)         |

<sup>a</sup>3 participants were unsure about prior TB diagnoses. <sup>b</sup>3 participants had an unknown HIV status. <sup>c</sup>1 participant was missing a sputum Xpert result.

**Table S9:** Diagnostic Accuracy for the Xpert-HR based on Sputum Xpert Reference Standard overall and by subgroup

| Category                             | TP  | FP | FN  | TN  | TB prevalence (%) | Sensitivity (%) | (95%CI)     | Specificity (%) | (95%CI)     | PPV (%) | (95%CI)     | NPV (%) | (95%CI)     |
|--------------------------------------|-----|----|-----|-----|-------------------|-----------------|-------------|-----------------|-------------|---------|-------------|---------|-------------|
| <b>Overall (cut-point &lt;-1.45)</b> | 908 | 29 | 401 | 268 | 18.5              | 90.2            | (86.3-93.4) | 69.4            | (66.8-71.9) | 40.1    | (36.3-43.9) | 96.9    | (95.6-97.9) |
| <b>Country</b>                       |     |    |     |     |                   |                 |             |                 |             |         |             |         |             |
| <b>Philippines</b>                   | 267 | 4  | 63  | 18  | 6.2               | 81.8            | (59.7-94.8) | 80.9            | (76.2-85.0) | 22.2    | (13.7-32.8) | 98.5    | (96.3-99.6) |
| <b>Vietnam</b>                       | 132 | 7  | 75  | 89  | 31.7              | 92.7            | (85.6-97.0) | 63.8            | (56.8-70.3) | 54.3    | (46.3-62.1) | 95.0    | (89.9-98.0) |
| <b>South Africa</b>                  | 180 | 5  | 111 | 44  | 14.4              | 89.8            | (77.8-96.6) | 61.9            | (56.0-67.5) | 28.4    | (21.4-36.2) | 97.3    | (93.8-99.1) |
| <b>Uganda</b>                        | 152 | 10 | 70  | 96  | 32.3              | 90.6            | (83.3-95.4) | 68.5            | (61.9-74.5) | 57.8    | (49.9-65.4) | 93.8    | (88.9-97.0) |
| <b>India</b>                         | 177 | 3  | 82  | 21  | 8.5               | 87.5            | (67.6-97.3) | 68.3            | (62.3-74.0) | 20.4    | (13.1-29.5) | 98.3    | (95.2-99.7) |
| <b>Sex</b>                           |     |    |     |     |                   |                 |             |                 |             |         |             |         |             |
| <b>Female</b>                        | 473 | 21 | 197 | 183 | 12.7              | 91.4            | (83.8-96.2) | 68.1            | (64.3-71.7) | 29.4    | (24.2-35.0) | 98.2    | (96.5-99.2) |
| <b>Male</b>                          | 435 | 8  | 204 | 85  | 23.3              | 89.7            | (84.7-93.5) | 70.6            | (67.0-74.0) | 48.2    | (43.0-53.3) | 95.7    | (93.6-97.3) |
| <b>HIV status</b>                    |     |    |     |     |                   |                 |             |                 |             |         |             |         |             |
| <b>HIV +ve</b>                       | 801 | 27 | 290 | 232 | 15.0              | 94.7            | (82.3-99.4) | 49.1            | (42.2-55.9) | 24.7    | (17.9-32.5) | 98.1    | (93.5-99.8) |
| <b>HIV -ve</b>                       | 106 | 2  | 110 | 36  | 19.2              | 89.6            | (85.2-93.0) | 73.4            | (70.7-76.0) | 44.4    | (40.1-48.8) | 96.7    | (95.3-97.8) |
| <b>Diabetes</b>                      |     |    |     |     |                   |                 |             |                 |             |         |             |         |             |
| <b>Yes</b>                           | 795 | 23 | 356 | 219 | 25.8              | 89.1            | (77.8-95.9) | 71.5            | (63.8-78.4) | 52.1    | (41.6-62.5) | 95.0    | (89.3-98.1) |
| <b>No</b>                            | 113 | 6  | 45  | 49  | 17.4              | 90.5            | (86.1-93.9) | 69.1            | (66.3-71.7) | 38.1    | (34.1-42.2) | 97.2    | (95.8-98.2) |
| <b>Collection method</b>             |     |    |     |     |                   |                 |             |                 |             |         |             |         |             |
| <b>capillary</b>                     | 172 | 5  | 105 | 43  | 14.8              | 89.6            | (77.3-96.5) | 62.1            | (56.1-67.8) | 29.1    | (21.9-37.1) | 97.2    | (93.5-99.1) |
| <b>venous</b>                        | 172 | 5  | 105 | 43  | 19.4              | 90.4            | (86.0-93.7) | 71.3            | (68.5-74.1) | 43.2    | (38.9-47.6) | 96.8    | (95.3-98.0) |

TP True positive, FP False positive, FN False Negative, TN true negative, PPV positive predictive value, NPV negative predictive value, CI confidence interval

**Figure S5.** Xpert TB HR Receiver Operating Characteristic (ROC) curve analysis against sputum Xpert reference standard.

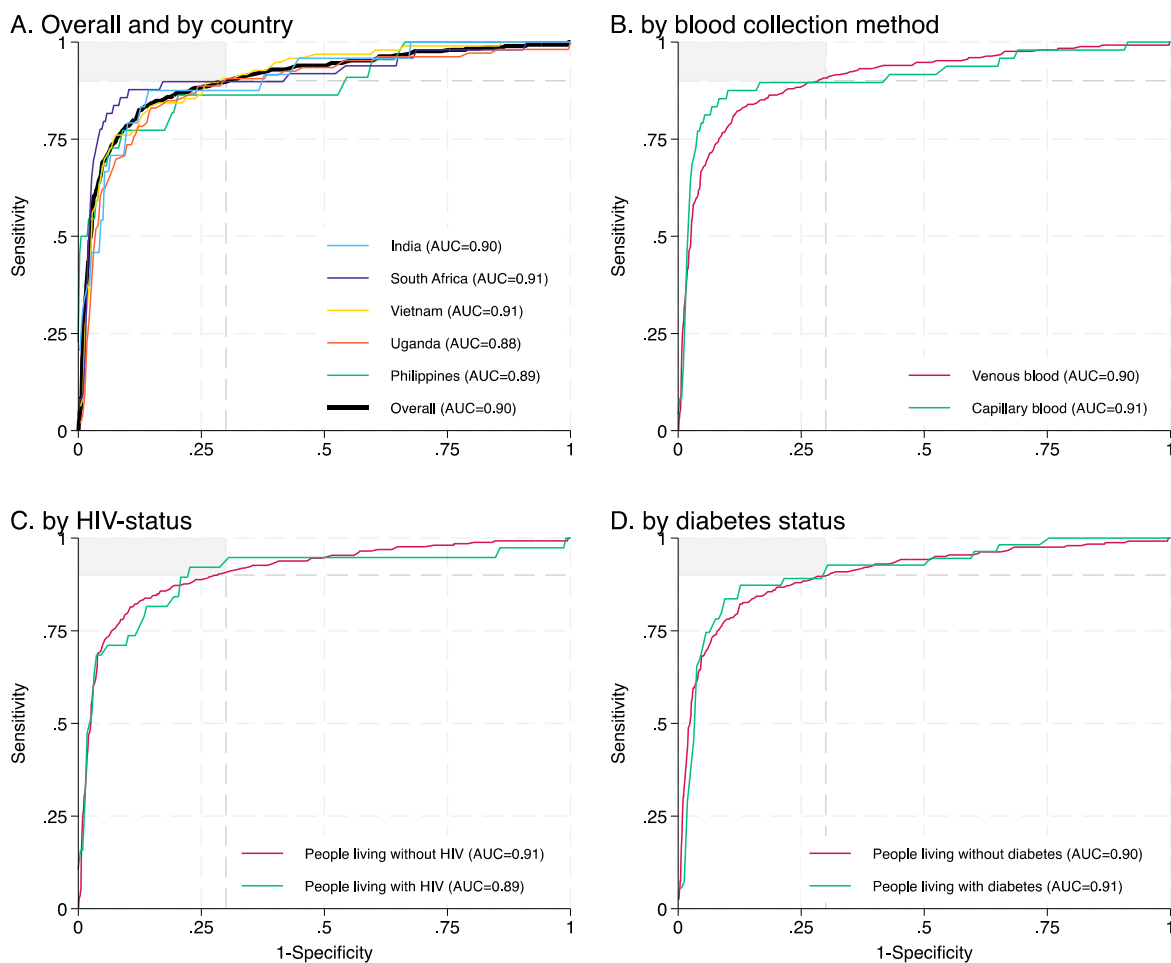

N=1606 participants with valid sputum Xpert Ultra results. Median TB Score was -2.90 (IQR -3.35 to -2.20) for participants positive by SXRS, and -1.05 (IQR -1.55 to -0.70) for participants negative by SXRS.

## STARD checklist

| Section & Topic          | No         | Item                                                                                                                                                   | Reported on page # |
|--------------------------|------------|--------------------------------------------------------------------------------------------------------------------------------------------------------|--------------------|
| <b>TITLE OR ABSTRACT</b> | <b>1</b>   | Identification as a study of diagnostic accuracy using at least one measure of accuracy (such as sensitivity, specificity, predictive values, or AUC)  | 1&2                |
| <b>ABSTRACT</b>          | <b>2</b>   | Structured summary of study design, methods, results, and conclusions (for specific guidance, see STARD for Abstracts)                                 | 3                  |
| <b>INTRODUCTION</b>      |            |                                                                                                                                                        |                    |
|                          | <b>3</b>   | Scientific and clinical background, including the intended use and clinical role of the index test                                                     | 5                  |
|                          | <b>4</b>   | Study objectives and hypotheses                                                                                                                        | 5                  |
| <b>METHODS</b>           |            |                                                                                                                                                        |                    |
| <i>Study design</i>      | <b>5</b>   | Whether data collection was planned before the index test and reference standard were performed (prospective study) or after (retrospective study)     | 6                  |
| <i>Participants</i>      | <b>6</b>   | Eligibility criteria                                                                                                                                   | 6                  |
|                          | <b>7</b>   | On what basis potentially eligible participants were identified (such as symptoms, results from previous tests, inclusion in registry)                 | 6                  |
|                          | <b>8</b>   | Where and when potentially eligible participants were identified (setting, location and dates)                                                         | 6                  |
|                          | <b>9</b>   | Whether participants formed a consecutive, random or convenience series                                                                                | 6                  |
| <i>Test methods</i>      | <b>10a</b> | Index test, in sufficient detail to allow replication                                                                                                  | 6                  |
|                          | <b>10b</b> | Reference standard, in sufficient detail to allow replication                                                                                          | 6-7                |
|                          | <b>11</b>  | Rationale for choosing the reference standard (if alternatives exist)                                                                                  | NA                 |
|                          | <b>12a</b> | Definition of and rationale for test positivity cut-offs or result categories of the index test, distinguishing pre-specified from exploratory         | 7                  |
|                          | <b>12b</b> | Definition of and rationale for test positivity cut-offs or result categories of the reference standard, distinguishing pre-specified from exploratory | 7                  |
|                          | <b>13a</b> | Whether clinical information and reference standard results were available to the performers/readers of the index test                                 | 7                  |



|                          |            |                                                                                                               |                                            |
|--------------------------|------------|---------------------------------------------------------------------------------------------------------------|--------------------------------------------|
|                          | <b>13b</b> | Whether clinical information and index test results were available to the assessors of the reference standard | 7                                          |
| <i>Analysis</i>          | <b>14</b>  | Methods for estimating or comparing measures of diagnostic accuracy                                           | 7                                          |
|                          | <b>15</b>  | How indeterminate index test or reference standard results were handled                                       | 7                                          |
|                          | <b>16</b>  | How missing data on the index test and reference standard were handled                                        | 7                                          |
|                          | <b>17</b>  | Any analyses of variability in diagnostic accuracy, distinguishing pre-specified from exploratory             | 7                                          |
|                          | <b>18</b>  | Intended sample size and how it was determined                                                                | 7                                          |
| <b>RESULTS</b>           |            |                                                                                                               |                                            |
| <i>Participants</i>      | <b>19</b>  | Flow of participants, using a diagram                                                                         | 8, Figure 1                                |
|                          | <b>20</b>  | Baseline demographic and clinical characteristics of participants                                             | 9                                          |
|                          | <b>21a</b> | Distribution of severity of disease in those with the target condition                                        | 9/Appendix                                 |
|                          | <b>21b</b> | Distribution of alternative diagnoses in those without the target condition                                   | NA                                         |
|                          | <b>22</b>  | Time interval and any clinical interventions between index test and reference standard                        | 12                                         |
| <i>Test results</i>      | <b>23</b>  | Cross tabulation of the index test results (or their distribution) by the results of the reference standard   | Appendix, table S7                         |
|                          | <b>24</b>  | Estimates of diagnostic accuracy and their precision (such as 95% confidence intervals)                       | 10/ Figure 3/ Appendix table S9            |
|                          | <b>25</b>  | Any adverse events from performing the index test or the reference standard                                   | NA                                         |
| <b>DISCUSSION</b>        |            |                                                                                                               |                                            |
|                          | <b>26</b>  | Study limitations, including sources of potential bias, statistical uncertainty, and generalisability         | 16-17                                      |
|                          | <b>27</b>  | Implications for practice, including the intended use and clinical role of the index test                     | 16-17                                      |
| <b>OTHER INFORMATION</b> |            |                                                                                                               |                                            |
|                          | <b>28</b>  | Registration number and name of registry                                                                      | ClinicalTrials.gov Identifier: NCT04923958 |
|                          | <b>29</b>  | Where the full study protocol can be accessed                                                                 | On request from authors                    |
|                          | <b>30</b>  | Sources of funding and other support; role of funders                                                         | 8, 18                                      |
